# Supplementary material for: Association of inflammatory biomarkers with subsequent clinical course in suspected late onset sepsis in preterm neonates
Source: PubMed Central journal article supplement (PMC7788923; doi:10.1186/s13054-020-03423-2), 2021-01-06
Supplement: 13054_2020_3423_MOESM2_ESM.pdf [file 13054_2020_3423_MOESM2_ESM.pdf]

## Additional file 2

**Table: Estimates of hazard ratios of each biomarker for 7-day mortality with and without adjusting for previous sepsis episodes.**

|                           | <i>Hazard ratio 7-day mortality</i> | <i>Hazard ratio 7-day mortality additionally adjusted for previous sepsis episode</i> |
|---------------------------|-------------------------------------|---------------------------------------------------------------------------------------|
| <i>Interleukin-6</i>      | HR 2.28 (1.64–3.16) **              | HR 2.25 (1.62–3.12) **                                                                |
| <i>Procalcitonin</i>      | HR 2.91 (1.70–5.00) **              | HR 2.91 (1.68–5.04) **                                                                |
| <i>C-reactive protein</i> | HR 1.16 (0.68–2.00)                 | HR 1.34 (0.76–2.36)                                                                   |

*Effect estimates reflect the hazard ratio with their 95% confidence intervals. \*\* $p < 0.001$ . Biomarker levels are  $\text{Log}(10)$  transformed plasma concentrations of IL-6 (pg/mL), PCT (ng/mL) and CRP (mg/L).*
