# Supplementary material for: Association of inflammatory biomarkers with subsequent clinical course in suspected late onset sepsis in preterm neonates
Source: PubMed Central journal article supplement (PMC7788923; doi:10.1186/s13054-020-03423-2), 2021-01-06
Supplement: 13054_2020_3423_MOESM3_ESM.pdf [file 13054_2020_3423_MOESM3_ESM.pdf]

### Additional file 3

**Table: Estimates of hazard ratios of each biomarker for 7-day mortality with and without adjusting for type of infection.**

|                           | <i>Hazard ratio 7-day mortality</i> | <i>Hazard ratio 7-day mortality additionally adjusted for type of infection<sup>1</sup></i> |
|---------------------------|-------------------------------------|---------------------------------------------------------------------------------------------|
| <i>Interleukin-6</i>      | 2.28 (1.64–3.16) **                 | 1.76 (1.14–2.73) *                                                                          |
| <i>Procalcitonin</i>      | 2.91 (1.70–5.00) **                 | 2.07 (1.11–3.86) *                                                                          |
| <i>C-reactive protein</i> | 1.16 (0.68–2.00)                    | 0.67 (0.38–1.20)                                                                            |

<sup>1</sup>Type of infection defined in 4 categories: no – culture negative – Gram positive – Gram negative sepsis. Effect estimates reflect the hazard ratio with their 95% confidence intervals. \* $p < 0.05$  \*\*  $p < 0.001$ . Biomarker levels are  $\text{Log}(10)$  transformed plasma concentrations of IL-6 (pg/mL), PCT (ng/mL) and CRP (mg/L).
